# Supplementary material for: Early Pregnancy Influences the Expression of Estrogen Receptors in the Ovine Thymus, Lymph Node, Spleen, and Liver
Source: Preprints.org preprint supplement (doi:10.20944/preprints202409.0493.v1), 2024-09-09

Figure S1    Original Western Blot

**Thymus ER $\alpha$**

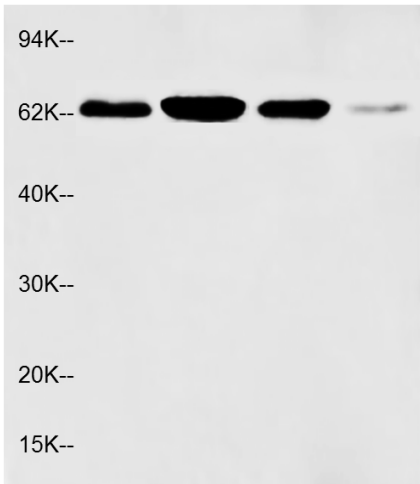

**Thymus ER $\beta$**

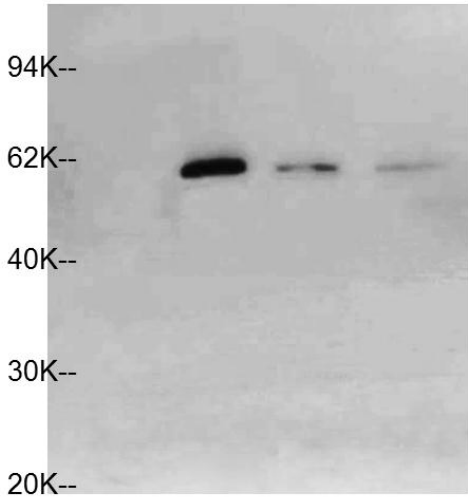

**Lymph node ER $\alpha$**

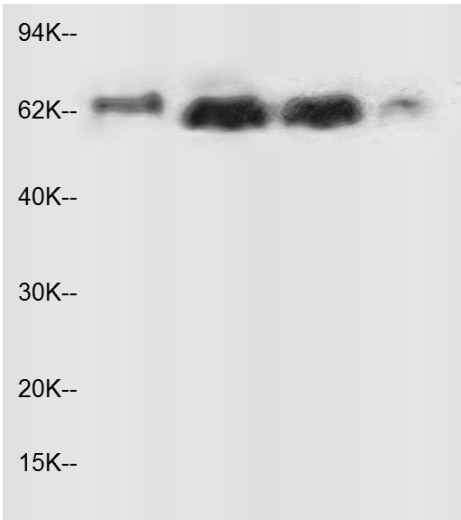

**Lymph node ER $\beta$**

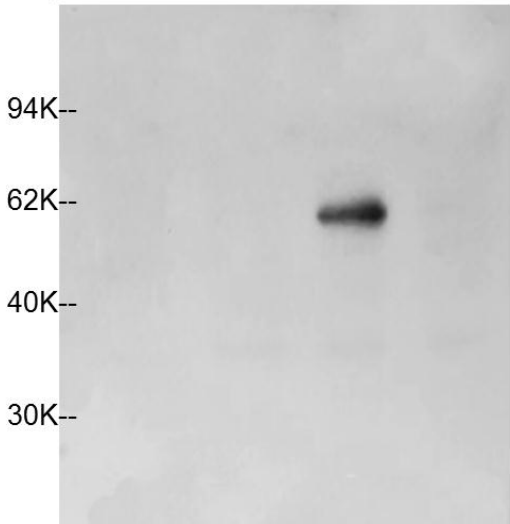

**Spleen ER $\alpha$**

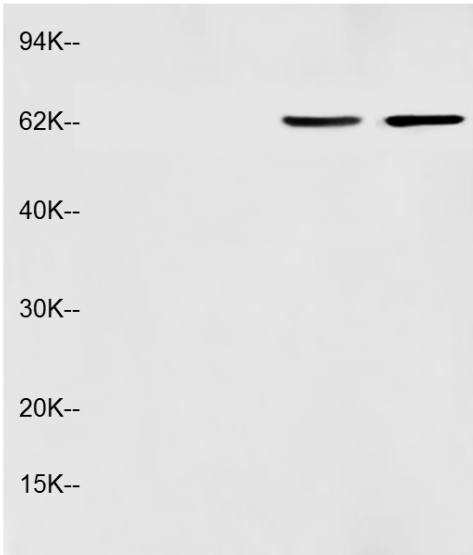

**Spleen ER $\beta$**

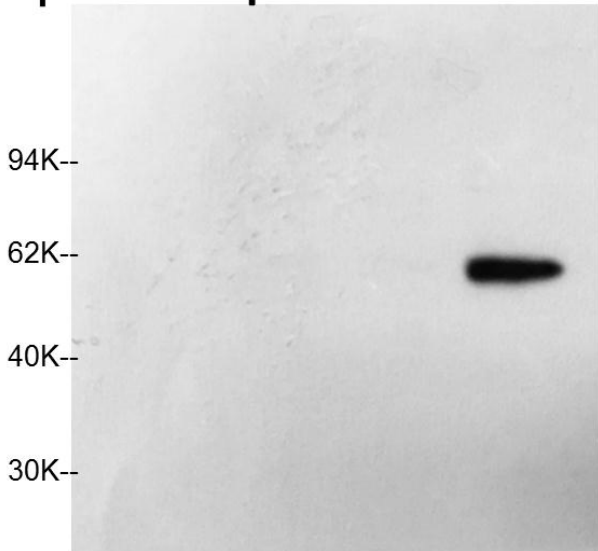

## Liver ER $\alpha$

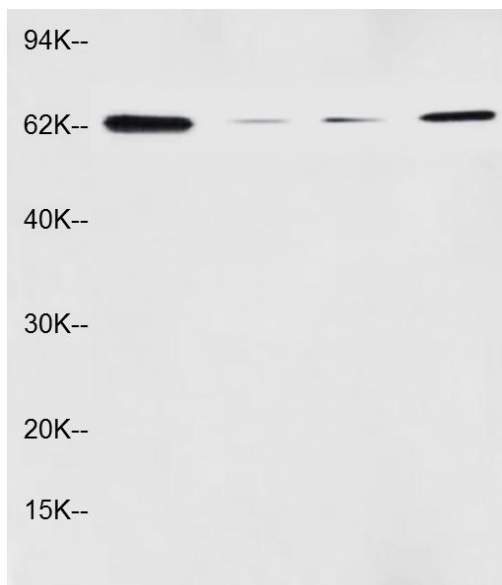

## Liver ER $\beta$

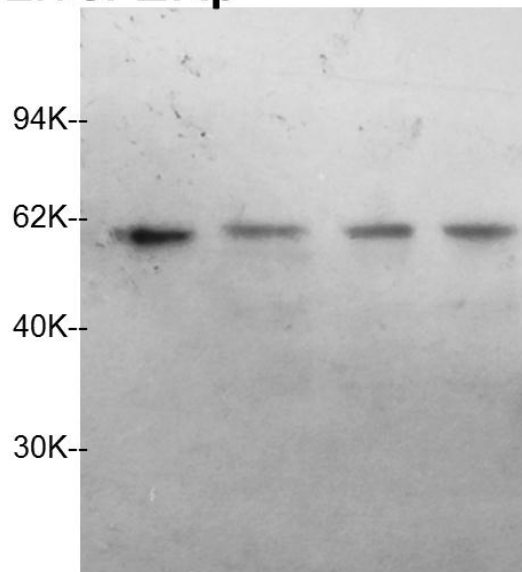

Supplement: Supplementary file 1 [file supplementary]
